# The Effects of Target Skeletal Muscle Cells on Dorsal Root Ganglion Neuronal Outgrowth and Migration In Vitro

Weiwei Zhang, Zhenzhong Li\*

Department of Anatomy, Shandong University School of Medicine, Jinan, China

## Abstract

Targets of neuronal innervations play a vital role in regulating the survival and differentiation of innervating neurotrophin-responsive neurons. During development, neurons extend axons to their targets, and then their survival become dependent on the trophic substances secreted by their target cells. Sensory endings were present on myoblasts, myotubes, and myofibers in all intrafusal bundles regardless of age. The interdependence of sensory neurons and skeletal muscle (SKM) cells during both embryonic development and the maintenance of the mature functional state has not been fully understood. In the present study, neuromuscular cocultures of organotypic dorsal root ganglion (DRG) explants and dissociate SKM cells were established. Using this culture system, the morphological relationship between DRG neurons and SKM cells, neurites growth and neuronal migration were investigated. The migrating neurons were determined by fluorescent labeling of microtubule-associated protein-2 (MAP-2) and neurofilament 200 (NF-200) or growth-associated protein 43 (GAP-43). The expression of NF-200 and GAP-43 and their mRNAs was evaluated by Western blot assay and real time-PCR analysis. The results reveal that DRG explants showed more dense neurites outgrowth in neuromuscular cocultures as compared with that in the culture of DRG explants alone. The number of total migrating neurons (the MAP-2-expressing neurons) and the percentage NF-200-immunoreactive (IR) and GAP-43-IR neurons increased significantly in the presence of SKM cells. The levels of NF-200 and GAP-43 and their mRNAs increased significantly in neuromuscular cocultures as compared with that in the culture of DRG explants alone. These results suggested that target SKM cells play an important role in regulating neuronal protein synthesis, promoting neurites outgrowth and neuronal migration of DRG explants in vitro. These results not only provide new clues for a better understanding of the association of SKM cells with DRG sensory neurons during development, they may also have implications for axonal regeneration after nerve injury.

**Citation:** Zhang W, Li Z (2013) The Effects of Target Skeletal Muscle Cells on Dorsal Root Ganglion Neuronal Outgrowth and Migration In Vitro. PLoS ONE 8(1): e52849. doi:10.1371/journal.pone.0052849

**Editor:** Giorgio F. Gilestro, Imperial College London, United Kingdom

**Received:** June 15, 2012; **Accepted:** November 21, 2012; **Published:** January 14, 2013

**Copyright:** © 2013 Zhang and Li. This is an open-access article distributed under the terms of the Creative Commons Attribution License, which permits unrestricted use, distribution, and reproduction in any medium, provided the original author and source are credited.

**Funding:** This work was supported by the National Natural Science Foundation of China (No. 30973051) and the Natural Science Foundation of Shandong Province of China (ZR2010HM027). The funders had no role in study design, data collection and analysis, decision to publish, or preparation of the manuscript.

**Competing Interests:** The authors have declared that no competing interests exist.

\* E-mail: zli@sdu.edu.cn

## Introduction

Targets of neuronal innervations play a vital role in regulation of the survival and differentiation of innervating neurotrophin (NT)-responsive neurons [1]. The motor neurons and skeletal muscle (SKM) fibers innervations depend on each other strongly [2–3]. Important communication between both tissues is mediated through the neuromuscular junction. Release and reception of various factors at other parts of both tissues must be considered as means of mutual influences [4]. Exchange of neurotrophins (NTs) and other molecules is likely to be an important source of nerve-muscle communication. NTs potentiate presynaptic release of neurotransmitter [5–6] and are essential for motor neuron survival [7], as well as for the maintenance of postsynaptic characteristic develop and maturation of muscle. Synapse-forming axons have vital effect on cell-surface behavior at nerve-muscle contacts during synaptogenesis in co-cultures of rat ventral spinal cord neurons and myotubes [8]. Neuromuscular junction development has been identified with co-cultures of dissociated embryonic neurons and SKM cells [9]. Innervations induce formation of a mature SKM-like excitation-contraction coupling system in cultured human muscle cells [10]. Peripheral nerve recovery after crush injury was suppressed by chronic inflammation in peripheral

target tissue [11]. Extracellular application of myosin II or skeletal muscle extract to neurons resulted in a robust increase in the number of axons initiated by each neuron or the number of survival neurons [12–13]. Sensory nerve cross-anastomosis (sensory protection) provides a modified trophic environment by modulating neurotrophic factor synthesis in muscle [14].

Microtubule associated protein-2 (MAP-2), which is very abundant in the mammalian nervous system, has been associated with the formation of neurites at early developmental stages and with the dendrite scaffold upon maturation [15]. MAP-2 has been used as a sensitive and specific marker for neurons [16]. Neurofilaments (NFs) are neuron-specific intermediate filaments. They are classed into three groups according to their molecular masses: neurofilament heavy, middle and light chains (NF-H, NF-M and NF-L). They maintain and regulate neuronal cytoskeletal plasticity through the regulation of neurites outgrowth, axonal caliber and axonal transport [17]. NF-H plays an important role in healthy neurons [18].

Growth-associated protein-43 (GAP-43), an axonally localized neuronal protein, plays a major role in many aspects of neuronal function in vertebrates [19–20]. GAP-43 may express in all subpopulations of small and large dorsal root ganglion (DRG) neurons [21–22] and plays an important role in growth cone

formation and neurites outgrowth of cultured DRG neurons [23]. GAP-43 is an intracellular growth-associated protein that appears to assist neuronal pathfinding and branching during development and regeneration [24]. Increases of GAP-43 are a frequently used marker of nerve regeneration or active sprouting of axons after traumatic injury in vivo [25–29] and an indicator of neuronal survival in vitro [30–31].

The knowledge of mutual interactions between postsynaptic receptors and presynaptic partner neurons during development and differentiation is very limited [32]. New interpretations of prior knowledge between neurons and muscle cells have been promoted by the preparations of the neuromuscular cocultures of motor neurons and SKM cells [33]. The interdependence of sensory neurons and SKM cells during both embryonic development and the maintenance of the mature functional state had not been fully understood. We hypothesized that target SKM cells may promote neuronal outgrowth, migration and expression of neuronal proteins. In the present study, neuromuscular cocultures of organotypic DRG and SKM cells were established. Using this culture system, we investigated the contribution of target tissues to neuronal outgrowth, migration and expression of neurofilament 200 (NF-200) and GAP-43.

## Results

### Morphology of DRG neurons and SKM cells in neuromuscular cocultures

In the DRG explants cultures, the DRG explants sent large radial projections to the peripheral area. The axons formed a lace-like network with crossing patterns in the peripheral area. The single migrating neurons scattered in the space of the network and sent axons to join the network (Fig. 1).

In neuromuscular coculture, most of SKM cells are fused to form myotubes which maybe branched or take the shape of long rods. The axons from DRG explant frequently. Some axons terminate upon contact with the contracting SKM cells, others may choose to ignore the surfaces of SKM cells. The axons would cross each other to form a fine network on the surface of the single layered SKM cells. The crossing axons adhere to each other hence the displacement of one terminal axon on a contracting muscle cell would also oscillate the proximally area of the axonal network. The configurations of the terminal axons observed under SEM were variable. Some axons would widen into a varicosity, some would become smaller in caliber and many others appear to be no different from the immediate proximal configuration. The endings enlarge and terminate on the surface of SKM cells to form neuromuscular junction (NMJ)-like structures (Fig. 1,2).

### The number of nerve fiber bundles extended from DRG explants

At 6 days of culture age, DRG explants sends large radial projections 5–15  $\mu\text{m}$  in diameter to peripheral area. The number of nerve fiber bundles in neuromuscular coculture of DRG explants and SKM cells is  $20.80 \pm 1.91$ . The number of nerve fiber bundles in DRG explants culture is  $6.90 \pm 0.86$ . The number of nerve fiber bundles increased very significantly in the presence of target SKM cells ( $P < 0.001$ ) (Fig. 3).

### Total migrating neurons from DRG explants

Neuron migration from DRG explants begins 24 hours after plating. After 2 days, the individual neurons migrate from DRG explants to peripheral area. After 6 days, more and more individual neurons migrate from DRG explants. The migration distance can be up to several hundred micrometers into the

peripheral area around the explants. These individual neurons were multipolar or bipolar in configuration with central bodies up to 15 by 40  $\mu\text{m}$  in size. The total number of neurons migrated from DRG explants in neuromuscular cocultures is  $35.29 \pm 1.65$ . The total number of migrating neurons in DRG explants culture alone is  $16.61 \pm 1.16$ . The presence of target SKM cells promoted neuronal migration from DRG explants in the neuromuscular cocultures ( $P < 0.001$ ) (Fig. 4,5).

### The percentage of NF-200-IR neurons and GAP-43-IR neurons

To test the effects of SKM cells on NF-200 and GAP-43 expression in migrating DRG neurons from DRG explants, cultures of DRG explants were incubated for 6 days in the presence or absence of SKM cells and processed for double fluorescent labeling of MAP-2 and NF-200 or GAP-43, and then the percentage of DRG neurons containing NF-200 or GAP-43 was quantified. The percentage of NF-200-IR ( $54.78\% \pm 3.89\%$ ) migrating neurons from DRG explants in neuromuscular cocultures is higher than that in DRG explants culture alone ( $41.34\% \pm 3.25\%$ ) ( $P < 0.05$ ) (Fig. 6). The percentage of GAP-43-IR ( $76.59\% \pm 1.49\%$ ) migrating neurons from DRG explants in neuromuscular coculture is also higher than that in DRG explants culture alone ( $39.86\% \pm 2.10\%$ ) ( $P < 0.001$ ) (Fig. 7).

### The mRNA levels of NF-200 and GAP-43

To determine the mRNA levels of NF-200 and GAP-43, the DRG explants at 6 days of culture age in the presence or absence of SKM cells were analyzed by real time-PCR. NF-200 mRNA levels increased in neuromuscular cocultures ( $1.75 \pm 0.09$  folds,  $P < 0.001$ ) as compared with that in DRG explants culture alone. Similarly, GAP-43 mRNA levels also increased in neuromuscular cocultures ( $2.00 \pm 0.16$  folds,  $P < 0.01$ ) as compared with that in DRG explants culture alone (Fig. 8).

### The protein levels of NF-200 and GAP-43

To determine the protein levels of NF-200 and GAP-43, the DRG explants at 6 days of culture age in the presence or absence of SKM cells were analyzed by Western blot assay. NF-200 protein levels increased in neuromuscular cocultures ( $1.46 \pm 0.02$  folds,  $P < 0.001$ ) as compared with that in DRG explants culture alone (Fig. 9). GAP-43 protein levels increased in neuromuscular cocultures ( $1.68 \pm 0.04$  folds,  $P < 0.001$ ) as compared with that in DRG explants culture alone, too (Fig. 10).

## Discussion

During development, neurons extend axons to their targets. The neurites' survival then becomes dependent on the trophic substances secreted by their target cells [34]. Target tissues contribute to the phenotypic and functional development of sensory neurons [35–36]. The interdependence of sensory neurons and SKM cells has not been fully understood. To better understand the interactions between sensory neurons and SKM cells, neuromuscular cocultures of organotypic DRG explants and dissociate SKM cells were established in the present study. Using this culture system, the morphological relationship between DRG neurons and SKM cells, neurites growth and neuronal migration were investigated. The results reveal that DRG explants show denser neurites outgrowth in neuromuscular cocultures as compared with that in the culture of DRG explants alone. The number of total migrating neurons (the MAP-2-expressing neurons) and the percentage of NF-200-IR and GAP-43-IR neurons increased significantly in the presence of SKM cells.

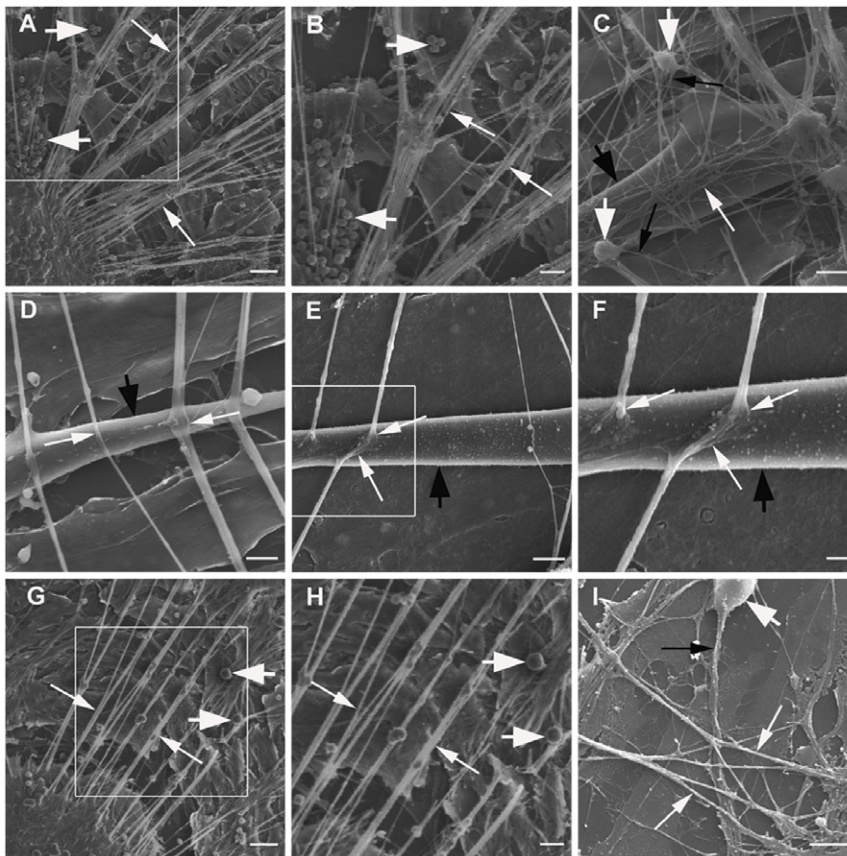

**Figure 1. SEM photomicrographs of the neuromuscular coculture (A–F) and DRG explants culture alone (G–I).** Panel A: DRG explants send numerous large radial projections (thin arrows) to the peripheral area in neuromuscular coculture. Many neurons (thick arrows) migrated from DRG explants to the peripheral area. Panel B: The enlargement of the box in Panel A. Panel C: The axons form a dense lace-like network (thin white arrows) with crossing patterns on the surface of single layer SKM cells (thick black arrow) in neuromuscular coculture. The single migrating neurons (thick white arrows) scattered in the space of the network and send axons (thin black arrows) joining the network. Panel D: The axons cross (thin white arrows) on the surface of a single SKM cell (thick black arrow). Panel E: The endings of the axons enlarge and terminate on the surface of a single SKM cell (thick black arrow) to form NMJ-like structures (thin white arrows). Panel F: The enlargement of the box in Panel E. Panel G: DRG explants send radial projections (thin arrows) to peripheral area in DRG explants culture. A few neurons (thick arrows) migrated from DRG explants to the peripheral area. Panel H: The enlargement of the box in Panel G. Panel I: The axons form a sparse lace-like network (thin white arrows) with crossing patterns in the peripheral area in DRG explants culture. The single migrating neuron (thick white arrow) sends axons (thin black arrow) joining the network. Scale bar = 50  $\mu\text{m}$  in Panel A, G; Scale bar = 25  $\mu\text{m}$  in Panel B, H; Scale bar = 10  $\mu\text{m}$  in Panel C; Scale bar = 5  $\mu\text{m}$  in Panel D, E, I; Scale bar = 2.5  $\mu\text{m}$  in Panel F.

doi:10.1371/journal.pone.0052849.g001

Furthermore, the levels of NF-200 and GAP-43 and their mRNAs also increased significantly in neuromuscular cocultures as compared with that in the culture of DRG explants alone. These results suggested that target SKM cells play an important role in

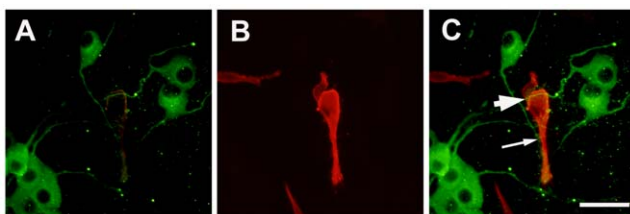

**Figure 2. Double fluorescent labeling of MAP-2 (for neurons) and muscle actin (for muscle cells).** Panel A : MAP-2 for DRG neurons; Panel B: muscle actin for SKM cells; Panel C: overlay of Panel A and B. The migrating neurons send axons cross over (thick arrow) and terminate on (thin arrow) the surface of SKM cells. Scale bar = 50  $\mu\text{m}$ . doi:10.1371/journal.pone.0052849.g002

the regulation of neuronal protein synthesis, promoting neurites outgrowth and neuronal migration of DRG explants in vitro.

MAP-2 is a cytoskeletal protein. It plays a regulatory role in neuronal plasticity and in maintaining the morphology of differentiated neurons [37]. MAP-2 has been tentatively implicated in neuronal outgrowth and polarity of neuronal cells [15]. It has been shown that MAP-2 is specifically expressed in neuronally differentiated cells [16]. MAP-2 is a cytoskeletal phosphoprotein that regulates the dynamic assembly characteristics of microtubules and it appears to provide scaffolding for organelle distribution into the dendrites and for the localization of signal transduction apparatus in dendrites [38]. It has been suggested that MAP-2 can interact with cytoskeletal components and might be critically involved in neurites initiation [39]. Within the neuronal cell, MAP-2 proteins are known to interact with  $\beta$ -tubulin, neurofilaments (NFs) and actins, and contribute to dendrite outgrowth and maintenance of neuronal cytoarchitecture [40–41]. In the present study, MAP-2 was used as a neuronal marker to detect neurons in different culture conditions. The migrating MAP-2-IR neurons increased significantly in neuro-

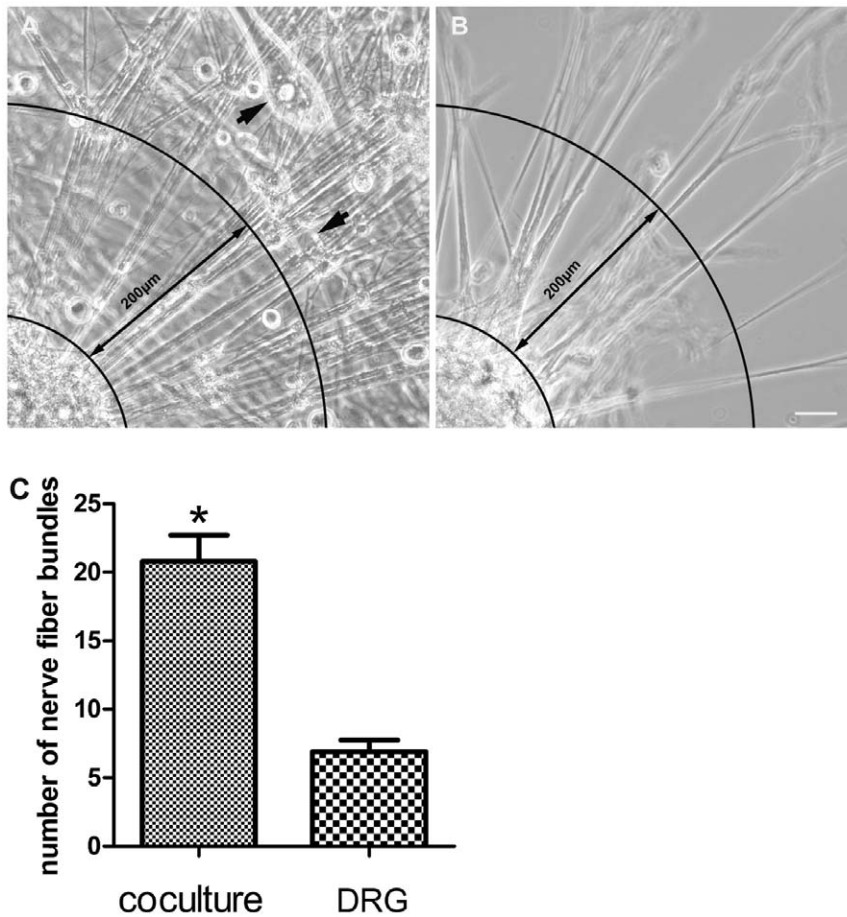

**Figure 3. Nerve fiber bundles extended from DRG explants.** Panel A, B: The example images to show how to quantify nerve fiber bundles. Nerve fiber bundles extended from DRG explants as far as 200 µm from the edge of a quarter of each DRG explants was counted in each sample. Panel A is neuromuscular coculture (thick arrows show SKM cells). Panel B is DRG explant culture. Panel C: The number of nerve fiber bundles extended from DRG explants. The number of nerve fiber bundles increased in neuromuscular coculture as compared with that in DRG explants culture alone. Bar graphs with error bars represent mean  $\pm$  SEM (n = 10 different samples). \* $P < 0.001$ . Scale bar = 40 µm. doi:10.1371/journal.pone.0052849.g003

muscular cocultures as compared with that in DRG cultures. These results suggested that target SKM cells' participation in regulating DRG neuronal migration in vitro is fundamental.

The number of neurons migrated from DRG explants and the number of nerve fiber bundles extended from DRG explants represent the outgrowth state of organotypic DRG explants in cultures. In the present study, we also observed that the number of

nerve fiber bundles increased significantly in neuromuscular coculture as compared with that in DRG culture alone. These results suggested that target SKM cells play a very important role in regulating DRG neuronal neurites outgrowth and maintenance of neuronal cytoarchitecture in vitro. Interestingly, this in vitro model indicates that the primary sensory nerve endings and SKM cells are much more closely related morphologically than those in

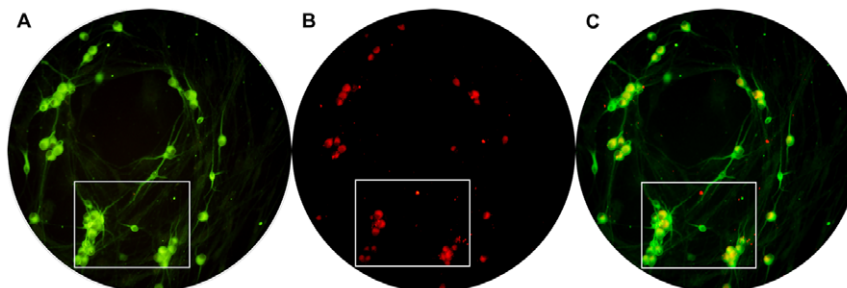

**Figure 4. The example images to show how to count cells.** The full visual field showed in the circle in which neurons were counted in one sample. The neurons in the box were showed in figure 6. Panel A is the total neurons (MAP-2-IR neurons). Panel B is NF-200-IR neurons. Panel C is the overlay of Panel A and B. doi:10.1371/journal.pone.0052849.g004



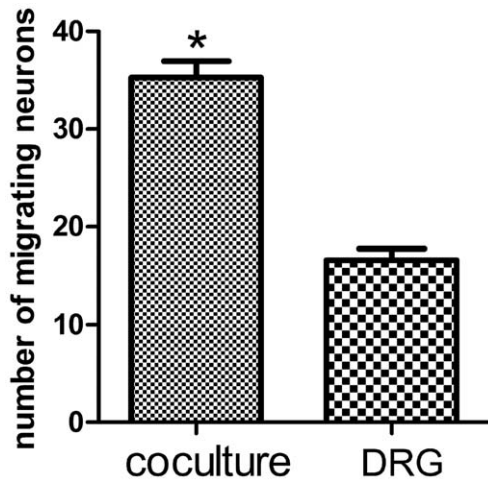

**Figure 5. Total migrating neurons from DRG explants.** Total number of migrating neurons from DRG explants increased in neuromuscular coculture as compared with that in DRG explants culture alone. Bar graphs with error bars represent mean  $\pm$  SEM (n=38 different samples). \* $P$ <0.001. doi:10.1371/journal.pone.0052849.g005

vivo conditions. The present study provides novel evidence that the formation of NMJ-like structures may exist in the co-culture of organotypic DRG neurons and SKM cells. This result implicated that anatomical neuromuscular contact between sensory neurons and SKM cells, or the morphological sensory innervations of dissociated SKM cells was established in vitro. Once neurons recognize their appropriate targets, specific neuron-target contacts will be established. These contacts are involved with modulation of neurites growth dynamics and the formation of functional synaptic connections [42–44]. Cell-cell recognition often requires the formation of a highly organized pattern of receptor proteins in the intercellular junction, like a synapse [45]. The mechanisms of the formation of NMJ-like structures observed in the present experiment may depend on the different proteins synthesized in both DRG neuronal terminals and target SKM cells.

NF-H (NF-200) plays an important role in healthy neurons [18]. The appearance of NF-H represents a critical event in the stabilization of axons that accompanies their maturation [46]. In the present study, the percentage of NF-200-IR neurons, NF-200 protein and its mRNA expression ratio increased significantly in the presence of target SKM cells. These results suggested that target SKM cells are important not only for promoting NF-200-IR

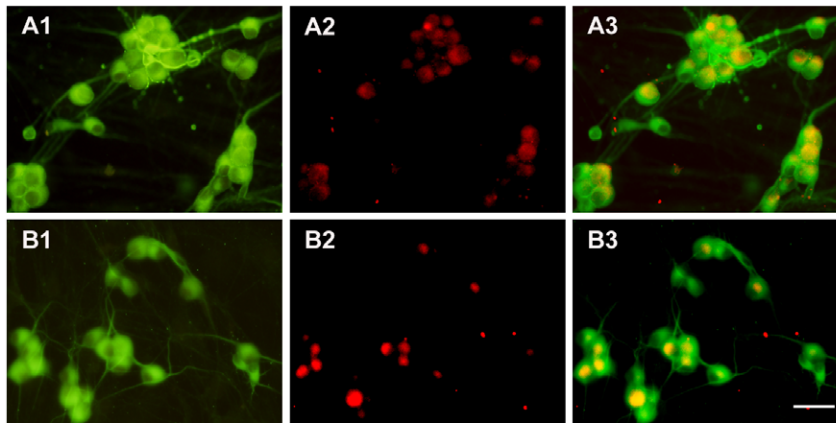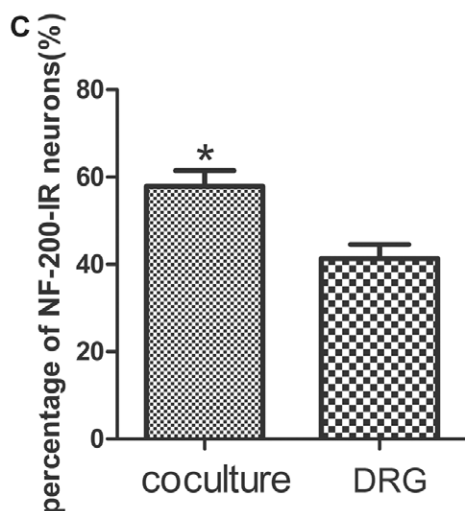

**Figure 6. Double fluorescent labeling of MAP-2 and NF-200.** Panel A: neuromuscular coculture (A1: MAP-2; A2: NF-200; A3: overlay of A1 and A2). Panel B: DRG explant culture (B1: MAP-2; B2: NF-200; B3: overlay of B1 and B2). Panel C: The percentage of migrating NF-200-IR neurons. The percentage of NF-200-IR neurons increased in neuromuscular coculture as compared with that in DRG explants culture alone. Bar graphs with error bars represent mean  $\pm$  SEM (n=20 different samples), Scale bar = 50  $\mu$ m. \* $P$ <0.05. doi:10.1371/journal.pone.0052849.g006

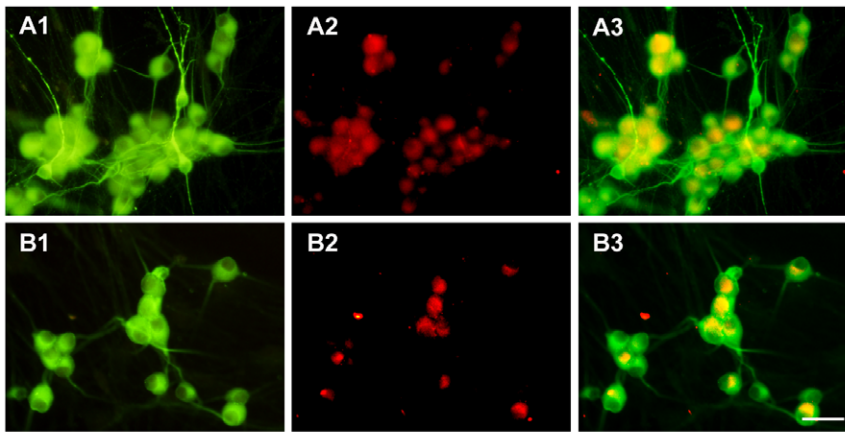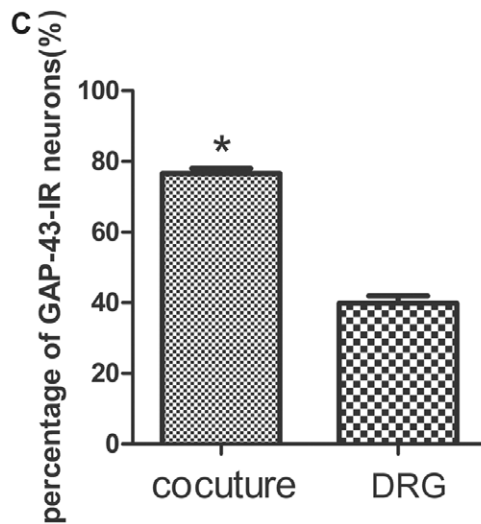

**Figure 7. Double fluorescent labeling of MAP-2 and GAP-43.** Panel A: neuromuscular coculture (A1: MAP-2; A2: GAP-43; A3: overlay of A1 and A2). Panel B: DRG explant culture (B1: MAP-2; B2: GAP-43; B3: overlay of B1 and B2). Panel C: The percentage of migrating GAP-43-IR neurons. The percentage of GAP-43-IR neurons increased in neuromuscular coculture as compared with that in DRG explants culture alone. Bar graphs with error bars represent mean  $\pm$  SEM (n = 18 different samples), Scale bar = 50  $\mu$ m. \* $P < 0.001$ . doi:10.1371/journal.pone.0052849.g007

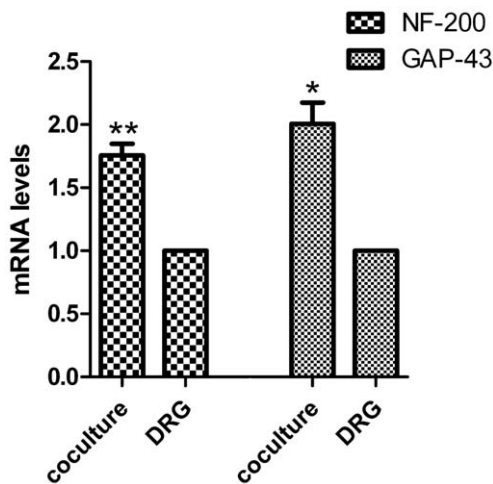

**Figure 8. The mRNA levels of NF-200 and GAP-43.** The mRNA levels of NF-200 and GAP-43 increased in neuromuscular coculture as compared with that in DRG explants culture alone. Bar graphs with error bars represent mean  $\pm$  SEM (n = 6). \* $P < 0.01$ , \*\* $P < 0.001$ . doi:10.1371/journal.pone.0052849.g008

neuronal migration but also for maintaining NF-IR neuronal phenotype.

GAP-43 is a membrane-bound molecule expressed in neurons. It is particularly abundant during periods of axonal outgrowth in development and regeneration of the central and peripheral nervous systems. It is known that GAP-43 mRNA is expressed in the DRG of adult rat and that GAP-43 is upregulated in DRG neurons during regeneration [47]. The expression of GAP-43 mRNA is higher in DRG neurons after peripheral nerve lesions [48]. A recent study has shown that the enhancement of neurites outgrowth is associated with the expression of GAP-43 in DRG cultures [49]. The expression of GAP-43 mRNA in primary cultured DRG neurons correlates very well with morphological changes of neurites degeneration [50]. The enhanced growth state is accompanied by an increase in the expression of GAP-43 in preinjured but not intact DRG [51]. In the present study, organotypic cultured DRG explants seem to represent an injured state, since the neurons are axotomized during culture preparation. In this experiment, the percentage of GAP-43-IR neurons, the levels of GAP-43 protein increased parallelly with its mRNA in the neuromuscular cocultures as compared with that in the culture of DRG explants alone. These results suggested that target SKM

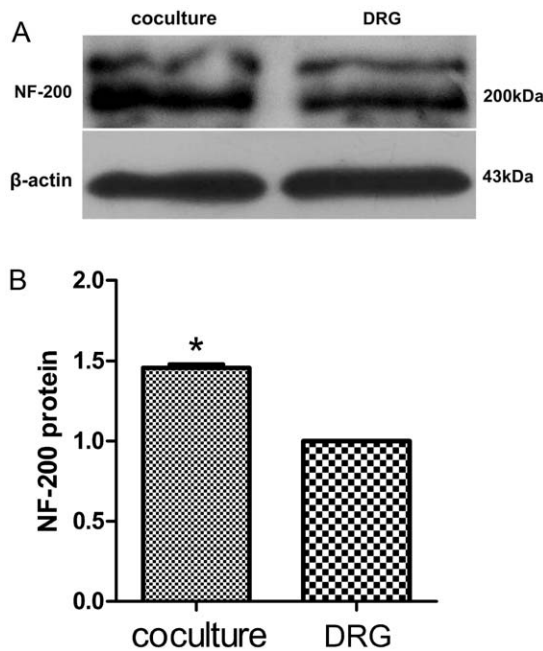

**Figure 9. The protein levels of NF-200.** The protein levels of NF-200 increased in neuromuscular coculture as compared with that in DRG explants culture alone. Bar graphs with error bars represent mean  $\pm$  SEM (n = 6). \* $P < 0.001$ . doi:10.1371/journal.pone.0052849.g009

cells play an important role in neurites regeneration from DRG explants in vitro.

The percentage of NF-200-IR and GAP-43-IR neurons as well as the number of total migrating neurons (the MAP-2-expressing neurons) increased significantly in the presence of target SKM cells suggested that target SKM cells not only promoted neuronal migration but also promoted neurite regeneration and maintained NF-IR neuronal phenotype which might contact with muscle spindle [52]. The formation of NMJ-like structures between enlarged nerve endings and the surface of SKM cells observed in the present study suggesting more closely relationship between the neurites and muscle cells in vitro as compared with that happened in vivo. Hence, the results of the present study provide new insights for further exploring the mutual interactions between postsynaptic receptors and presynaptic partner neurons during development and differentiation.

In conclusion, the results of the present study suggested that target SKM cells play an important role in regulating neuronal protein synthesis, maintaining neuronal survival and plasticity, promoting neurites outgrowth and neuronal migration of DRG explants in vitro. These results not only provide new clues for a better understanding of the association of target SKM cells with DRG sensory neurons during development, but they also show the target SKM cells may have implications for axonal regeneration after nerve injury.

## Materials and Methods

### Ethics Statement

All animals were cared for in accordance with the National Institute of Health Guide for the Care and Use of Laboratory Animals (revised 1996; <http://www.nap.edu>). All procedures described herein were reviewed by and had prior approval by the Ethical Committee for Animal Experimentation of the

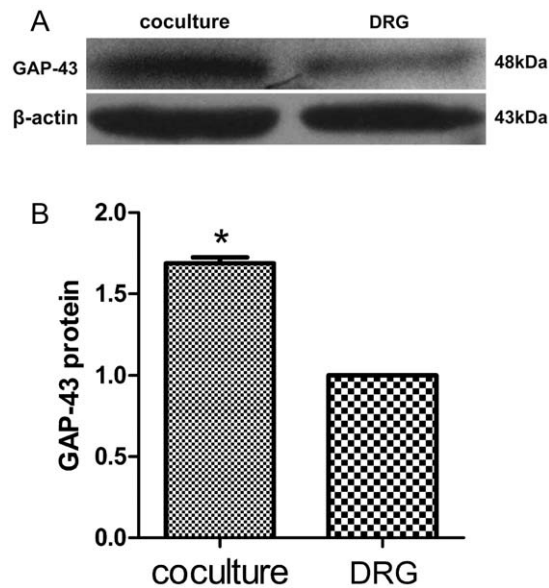

**Figure 10. The protein levels of GAP-43.** The protein levels of GAP-43 increased in neuromuscular coculture as compared with that in DRG explants culture alone. Bar graphs with error bars represent mean  $\pm$  SEM (n = 6). \* $P < 0.001$ . doi:10.1371/journal.pone.0052849.g010

Shandong University. All surgery was performed under anesthesia, and all efforts were made to minimize suffering of the animals.

### Cell culture preparations

The organotypic DRG culture preparations utilized embryonic rats taken from the breeding colony of Wistar rats maintained in the Experimental Animal Center at Shandong University of China. DRG explants were obtained from embryonic day 15 (E15) rat embryos. Under aseptic conditions, the bilateral dorsal root ganglia (DRGs) were removed from each rat embryo by microforceps and placed in culture media in half of Petri dishes and used for neuromuscular cocultures. Each DRG explants was plated at the bottom of each well of 24-well clusters (Costar, Corning, NY, USA).

SKM cell culture preparations utilize newborn Wistar rats. SKM cell cultures were prepared 3 days prior to DRG preparation. In brief, limbs of neonatal rats were collected in  $\text{Ca}^{2+}$  and  $\text{Mg}^{2+}$ -free Hanks' balanced salt solution on ice. Muscles were removed and cut into fragments approximately 0.5 mm in diameter. After digestion with 0.25% trypsin (Sigma, USA) in D-Hanks solution at 37°C for 40 minutes, the cell suspension was filtered through 200 molybdenum copper mesh, centrifuged, and triturated in growth media supplemented with 5% fetal bovine serum (Gibco, Origin: Australia). Isolated SKM cells were plated at a density of  $2 \times 10^5$  cells/ml in 24-well clusters (Costar, Corning, NY, USA) which would contain 24 mm diameter coverslips precoated with poly-L-lysine (0.1 mg/ml). The 24-well clusters culture dish is then placed in incubator with proper culture environment, 37°C and 5%  $\text{CO}_2$ .

The neuromuscular coculture is prepared as following: Each newly prepared DRG explants was plated into a well with 3-day old SKM culture after confluency myoblast fusion has happened. The coculture with SKM cells is allowed to grow for an additional 6 days with media change every 2 days.

The composition of the culture media is DMEM/F-12 (1:1) supplemented with 10% fetal bovine serum (Gibco, Origin: Australia), 2% B-27 supplement (Gibco, Grand Island NY,

USA), L-glutamine (0.1 mg/ml, Sigma, USA), insulin (0.25  $\mu$ g/ml), penicillin (100 U/ml), and streptomycin (100  $\mu$ g/ml).

### Observation of morphological relationship between DRG neurons and SKM cells

At 6 days of culture age, DRG cultures and neuromuscular coculture were processed for scanning electron microscopy (SEM) examination. The samples were rinsed quickly once in 0.01 mol/L PBS and prefixed in 2.5% glutaraldehyde solution for 12 hours. Post-fixation was done with a 1% osmium tetroxide solution for 90 minutes. After dehydrated in graded ethanol, the samples were treated with dehydrated alcohol/acetone solution (1:1) for 20 minutes, acetone for 30 minutes, and acetone/camphene solution (1:1) for 30 minutes, respectively. Then the samples were treated with liquid camphene twice for 20 minutes each at 45°C. After vacuum drying, the samples were covered with platinum by ion sputtering and examined under SEM (Hitachi S-570).

### Determination of neurites outgrowth from DRG explants

At 6 days of culture age, the number of nerve fiber bundles extended from DRG explants both in DRG culture alone or neuromuscular coculture was counted. Nerve fiber bundles extended from DRG explants as far as 200  $\mu$ m from the edge of a quarter of each DRG explants was counted in each sample. The length of nerve fiber bundle which is less than 200  $\mu$ m was not counted in this experiment.

### Immunocytochemistry

At 6 days of coculture age, DRG cultures and neuromuscular coculture were processed for immunofluorescent labeling. The cultures were rinsed quickly once in 0.1 mol/L phosphate buffer saline (PBS) to remove medium. The cells were fixed in 4% paraformaldehyde, pH 7.4, for 40 minutes at 4°C. After washing in 0.1 mol/L PBS for 3 times, the cells were blocked by 10% normal goat serum after 0.6% Triton X-100 PBS to block non-specific sites and permeabilize cells. The samples were incubated with primary antibody overnight at 4°C. After washing in 0.1 mol/L PBS 3 times, the samples were incubated by second antibody for 60 minutes in dark at 37°C. After washing 3 times in 0.1 mol/L PBS, the cells were coverslipped immediately with Vectashield anti-fade mounting media (Santa Cruz Biotechnology, USA) and stored at 4°C until observation by fluorescent microscope.

Primary antibody: mouse monoclonal anti-MAP-2 (1:400, abcam, Hong Kong); rabbit polyclonal anti-NF200 (1:500, abcam, Hong Kong); rabbit monoclonal anti-GAP-43 (1:1,000, abcam, Hong Kong); rabbit polyclonal anti-muscle actin (1:500, Abcam, Hong Kong). Second antibody: goat anti-mouse conjugated to Cy2 (1:400, abcam, Cambridge, UK); goat anti-rabbit conjugated to Cy3 (1:400, abcam, Cambridge, UK).

### Determination of total migrating neurons and the percentage of NF-200-IR or GAP-43-IR neurons from DRG explants

Total migrating neurons from DRG explants were determined as MAP-2-immunoreactive (IR) neurons under a fluorescence microscopy (Olympus) with 20 $\times$  objective lens. MAP-2-IR neurons in one visual field at the edge of DRG explants were counted as the total migrating neurons in each sample.

The migrating NF-200-IR or GAP-43-IR neurons from DRG explants were observed under a fluorescence microscope (Olympus) with 20 $\times$  objective lens. NF-200-IR or GAP-43-IR neurons in one visual field at the edge of DRG explants were counted as

the migrating NF-200-IR neurons in each sample. The numbers of total neurons (MAP-2-IR neurons) were also counted in the same visual field. Then, the percentage of NF-200-IR or GAP-43-IR neurons could be obtained.

### Real time-PCR analysis of mRNAs for NF-200 and GAP-43

The mRNA levels of NF-200 and GAP-43 in neuromuscular coculture and DRG culture alone at 6 days of culture age were analyzed by real time-PCR analysis. The DRG explants were removed from 24-well clusters by microforceps. The expression of glyceraldehyde-3-phosphate dehydrogenase (GAPDH) mRNA was also determined as an internal control. Total DRG RNA was isolated by TRIzol (TakaRa, Japan). cDNA was synthesized using cDNA synthesis kit (Fermentas, Canada) according to the manufacturer's instructions, followed by PCR amplification.

Specific primers were used together with SYBR green to assess expression levels according to the manufacturer's instructions. PCR were performed at 50°C for 2 minutes, 94°C for 15 minutes, followed by 40 cycles at 94°C for 15 seconds, 58°C for 30 seconds, and 72°C for 30 seconds.

In all cases, data were normalized for any minor variations in expression level of the housekeeping gene GAPDH. Data were expressed as fold induction using the  $2^{-\Delta\Delta C_t}$  method. Primer sequences for each gene examined are shown as follow: NF-200 5'- AAA GTG AAC ACG GAT GCT ATG C -3' (coding sense) and 5'- GTG CTT TTC AGT GCC TCC AAC -3' (coding antisense). GAP-43 5'- AAG AAG GAG GGA GAT GGC TCT -3' (coding sense) and 5'- GAG GAC GGC GAG TTA TCA GTG -3' (coding antisense). GAPDH 5'- GGC ACA GTC AAG GCT GAG AAT G -3' (coding sense) and 5'- ATG GTG GTG AAG ACG CCA GTA -3' (coding antisense).

### Western blot assay of NF-200 and GAP-43 protein

The protein levels of NF-200 and GAP-43 in DRG in neuromuscular coculture and DRG culture alone at 6 days of culture age were analyzed by Western blot assay, with  $\beta$ -actin as an internal control. The DRG explants were removed from 24-well clusters on ice and homogenized in 10 mmol/L Tris homogenization buffer (pH 7.4) with protease inhibitors (Sigma, USA). The samples were centrifuged at 10,000 g for 20 minutes at 4°C. After determining the protein concentrations of the supernatants (BCA method, standard: BSA), about 50  $\mu$ g protein per lane were resolved by SDS-PAGE (10%), and electrotransferred to nitrocellulose membranes followed by blocking with 5% dry milk powder for 1 h and immunostaining with the respective primary antibody dilution for 1 to 4 h at RT or over night at 4°C. The membranes were incubated with primary antibodies: rabbit anti-NF-200 polyclonal IgG (1:1,000, abcam, Hong Kong); rabbit anti-GAP-43 monoclonal IgG (1:100,000, abcam, Hong Kong); or mouse anti- $\beta$ -actin monoclonal IgG (1:4,000, Santa Cruz Biotechnology, USA). After being washed three times for 10 minutes with washing solution, the membranes were incubated with second antibody: goat anti-rabbit IgG-HRP (1:5,000, Santa Cruz Biotechnology, USA) or goat anti-mouse IgG-HRP (1:4,000, Santa Cruz Biotechnology, USA). Peroxidase activity was visualized with the ECL Western blotting detection kit (Millipore, Billerica, USA) according to the manufacturer's instructions, and protein content was determined by densitometrically scanning the exposed x-ray film and the images were analyzed quantitatively by using an *ImageJ* 1.39u image analysis software. The levels of NF-200 and GAP-43 were expressed as the ratio of the protein to  $\beta$ -actin.



## Statistical analysis

Data are expressed as mean  $\pm$  SEM. All the data were processed for verifying normality test for Variable. The normality tests have passed for all the data. Statistical analysis was evaluated with SPSS and GraphPad Prism 5.0 statistical software by *t* test for analysis of two independent samples. Significance was determined as  $P < 0.05$ .

## References

- Howe CL, Valletta JS, Rusnak AS, Mobley WC (2001) NGF signaling from clathrin-coated vesicles: evidence that signaling endosomes serve as a platform for the Ras-MAPK pathway. *Neuron* 32: 801–814.
- Torres-Benito L, Neher MF, Cano R, Ruiz R, Tabares L (2011) SMN requirement for synaptic vesicle, active zone and microtubule postnatal organization in motor nerve terminals. *PLoS One* 6: e26164.
- Rowan SL, Rygiel K, Purves-Smith FM, Solbak NM, Turnbull DM, et al. (2012) Denervation causes fiber atrophy and myosin heavy chain co-expression in senescent skeletal muscle. *PLoS One* 7: e29082.
- Mars T, Martinić DS (2001) Apoptosis in co-cultures of human muscle and rat spinal cord during the formation of the neuromuscular junction. *Pflügers Arch* 442: R177–178.
- Lohof AM, Ip NY, Poo MM (1993) Potentiation of developing neuromuscular synapses by the neurotrophins NT-3 and BDNF. *Nature* 363: 350–353.
- Wang XH, Poo MM (1997) Potentiation of developing synapses by postsynaptic release of neurotrophin-4. *Neuron* 19: 825–835.
- Oppenheim RW (1996) Neurotrophic survival molecules for motoneurons: an embarrassment of riches. *Neuron* 17: 195–197.
- Uhm CS, Neuhuber B, Lowe B, Crocker V, Daniels MP (2001) Synapse-forming axons and recombinant agrin induce microprocess formation on myotubes. *J Neurosci* 21: 9678–9689.
- Daniels MP, Lowe BT, Shah S, Ma J, Samuelsson SJ, et al. (2000) Rodent nerve-muscle cell culture system for studies of neuromuscular junction development: refinements and applications. *Microsc Res Tech* 49: 26–37.
- Tanaka H, Furuya T, Kameda N, Kobayashi T, Mizusawa H (2000) Triad proteins and intracellular Ca<sup>2+</sup> transients during development of human skeletal muscle cells in aneural and innervated cultures. *J Muscle Res Cell Motil* 21: 507–526.
- Kato N, Nemoto K, Kawaguchi M, Amako M, Arino H, et al. (2001) Influence of chronic inflammation in peripheral target tissue on recovery of crushed nerve injury. *J Orthop Sci* 6: 419–423.
- Valmier J, Mallie S, Baldy-Moulinier M (1993) Skeletal muscle extract and nerve growth factor have developmentally regulated survival promoting effects on distinct populations of mammalian sensory neurons. *Muscle Nerve* 16: 397–403.
- Silver L, Gallo G (2005) Extracellular Muscle Myosin II Promotes Sensory Axon Formation. *DNA Cell Biol* 24: 438–445.
- Zhao C, Veltri K, Li S, Bain JR, Fahnestock M (2004) NGF, BDNF, NT-3, and GDNF mRNA expression in rat skeletal muscle following denervation and sensory protection. *J Neurotrauma* 21: 1468–1478.
- Sanchez C, Diaz-Nido J, Avila J (2000) Phosphorylation of microtubule-associated protein 2 (MAP2) and its relevance for the regulation of the neuronal cytoskeleton function. *Prog Neurobiol* 61: 133–168.
- Liu Y, Saad RS, Shen SS, Silverman JF (2003) Diagnostic value of microtubule-associated protein-2 (MAP-2) for neuroendocrine neoplasms. *Adv Anat Pathol* 10: 101–106.
- Kesavapany S, Li BS, Pant HC (2003) Cyclin-dependent kinase 5 in neurofilament function and regulation. *Neurosignals* 12: 252–264.
- Gotow T (2000) Neurofilaments in health and disease. *Med Electron Microsc* 33: 173–199.
- Albright MJ, Weston MC, Inan M, Rosenmund C, Crair MC (2007) Increased thalamocortical synaptic response and decreased layer IV innervation in GAP-43 knockout mice. *J Neurophysiol* 98: 1610–1625.
- Gupta SK, Mishra R, Kusum S, Spedding M, Meiri KF, et al. (2009) GAP-43 is essential for the neurotrophic effects of BDNF and positive AMPA receptor modulator S18986. *Cell Death Differ* 16: 624–637.
- Bergman E, Carlsson K, Liljeborg A, Manders E, Hokfelt T, et al. (1999) Neuropeptides, nitric oxide synthase and GAP-43 in B4-binding and RT97 immunoreactive primary sensory neurons: normal distribution pattern and changes after peripheral nerve transection and aging. *Brain Res* 832: 63–83.
- Tsai SY, Chiu PY, Yang CP, Lee YH (2002) Synergistic effects of corticosterone and kainic acid on neurite outgrowth in axotomized dorsal root ganglion. *Neuroscience* 114: 55–67.
- Aigner L, Caroni P (1993) Depletion of 43-kD growth-associated protein in primary sensory neurons leads to diminished formation and spreading of growth cones. *J Cell Biol* 123: 417–429.
- Denny JB (2006) Molecular mechanisms, biological actions, and neuropharmacology of the growth-associated protein GAP-43. *Curr Neuropharmacol* 4: 293–304.
- Teng YD, Lavik EB, Qu X, Park KI, Ourednik J, et al. (2002) Functional recovery following traumatic spinal cord injury mediated by a unique polymer scaffold seeded with neural stem cells. *Proc Natl Acad Sci U S A* 99: 3024–3029.

## Author Contributions

Conceived and designed the experiments: ZL. Performed the experiments: WZ. Analyzed the data: WZ. Wrote the paper: ZL WZ.

- El-Nour H, Lundeberg L, Al-Tawil R, Granlund A, Lonne-Rahm SB, et al. (2006) Upregulation of the axonal growth and the expression of substance P and its NK1 receptor in human allergic contact dermatitis. *Immunopharmacol Immunotoxicol* 28: 621–631.
- Murata R, Ohtori S, Ochiai N, Takahashi N, Saisu T, et al. (2006) Extracorporeal shockwaves induce the expression of ATF3 and GAP-43 in rat dorsal root ganglion neurons. *Auton Neurosci* 128: 96–100.
- Mechsner S, Schwarz J, Thode J, Loddenkemper C, Salomon DS, et al. (2007) Growth-associated protein 43-positive sensory nerve fibers accompanied by immature vessels are located in or near peritoneal endometriotic lesions. *Fertil Steril* 88: 581–587.
- Nagamoto-Combs K, Morecraft RJ, Darling WG, Combs CK (2010) Long-term gliosis and molecular changes in the cervical spinal cord of the rhesus monkey after traumatic brain injury. *J Neurotrauma* 27: 565–585.
- Taberero A, Granda B, Medina A, Sanchez-Abarca LI, Lavado E, et al. (2002) Albumin promotes neuronal survival by increasing the synthesis and release of glutamate. *J Neurochem* 81: 881–891.
- Anand U, Otto WR, Bountra C, Chessell I, Sinisi M, et al. (2008) Cytosine arabinoside affects the heat and capsaicin receptor TRPV1 localisation and sensitivity in human sensory neurons. *J Neurooncol* 89: 1–7.
- Ettorre M, Lorenzetto E, Laperchia C, Baiguera C, Branca C, et al. (2012) Glutamatergic neurons induce expression of functional glutamatergic synapses in primary myotubes. *PLoS One* 7: e36049.
- Umbach JA, Adams KL, Gundersen CB, Novitsch BG (2012) Functional neuromuscular junctions formed by embryonic stem cell-derived motor neurons. *PLoS One* 7: e36049.
- Wang H, Tessier-Lavigne M (1999) En passant neurotrophic action of an intermediate axonal target in the developing mammalian CNS. *Nature* 401: 765–769.
- Lu J, Zhou XF, Rush RA (2001) Small primary sensory neurons innervating epidermis and viscera display differential phenotype in the adult rat. *Neurosci Res* 41: 355–363.
- Wang L, Liu Z, Liu H, Wan Y, Wang H, et al. (2009) Neuronal phenotype and tyrosine kinase receptor expression in cocultures of dorsal root ganglion and skeletal muscle cells. *Anat Rec (Hoboken)* 292: 107–112.
- Di Stefano G, Casoli T, Fattoretti P, Gracciotti N, Solazzi M, et al. (2001) Distribution of map2 in hippocampus and cerebellum of young and old rats by quantitative immunohistochemistry. *J Histochem Cytochem* 49: 1065–1066.
- Buddle M, Eberhardt E, Ciminello LH, Levin T, Wing R, et al. (2003) Microtubule-associated protein 2 (MAP2) associates with the NMDA receptor and is spatially redistributed within rat hippocampal neurons after oxygen-glucose deprivation. *Brain Res* 978: 38–50.
- Dehmelt L, Smart FM, Ozer RS, Halpain S (2003) The role of microtubule-associated protein 2c in the reorganization of microtubules and lamellipodia during neurite initiation. *J Neurosci* 23: 9479–9490.
- Ozer RS, Halpain S (2000) Phosphorylation-dependent localization of microtubule-associated protein MAP2c to the actin cytoskeleton. *Mol Biol Cell* 11: 3573–3587.
- Kaech S, Parmar H, Roelandse M, Bornmann C, Matus A (2001) Cytoskeletal microdifferentiation: a mechanism for organizing morphological plasticity in dendrites. *Proc Natl Acad Sci U S A* 98: 7086–7092.
- Baird DH, Trenkner E, Mason CA (1996) Arrest of afferent axon extension by target neurons in vitro is regulated by the NMDA receptor. *J Neurosci* 16: 2642–2648.
- Mason CA, Morrison ME, Ward MS, Zhang Q, Baird DH (1997) Axon-target interactions in the developing cerebellum. *Perspect Dev Neurobiol* 5: 69–82.
- Manzini MC, Ward MS, Zhang Q, Lieberman MD, Mason CA (2006) The stop signal revised: immature cerebellar granule neurons in the external germinal layer arrest pontine mossy fiber growth. *J Neurosci* 26: 6040–6051.
- Qi SY, Groves JT, Chakraborty AK (2001) Synaptic pattern formation during cellular recognition. *Proc Natl Acad Sci U S A* 98: 6548–6553.
- Yabe JT, Wang FS, Chylinski T, Katchmar T, Shea TB (2001) Selective accumulation of the high molecular weight neurofilament subunit within the distal region of growing axonal neurites. *Cell Motil Cytoskeleton* 50: 1–12.
- Anderson KD, Merhege MA, Morin M, Bolognani F, Perrone-Bizzozero NI (2003) Increased expression and localization of the RNA-binding protein HuD and GAP-43 mRNA to cytoplasmic granules in DRG neurons during nerve regeneration. *Exp Neurol* 183: 100–108.
- Kato N, Nemoto K, Arino H, Fujikawa K (2003) Influence of peripheral inflammation on growth-associated phosphoprotein (GAP-43) expression in

- dorsal root ganglia and on nerve recovery after crush injury. *Neurosci Res* 45: 297–303.
49. Tsai SY, Yang LY, Wu CH, Chang SF, Hsu CY, et al. (2007) Injury-induced Janus kinase/protein kinase C-dependent phosphorylation of growth-associated protein 43 and signal transducer and activator of transcription 3 for neurite growth in dorsal root ganglion. *J Neurosci Res* 85: 321–331.
  50. Keswani SC, Rosenberg B, Hoke A (2004) The use of GAP-43 mRNA quantification in high throughput screening of putative neuroprotective agents in dorsal root ganglion cultures. *J Neurosci Methods* 136: 193–195.
  51. Cafferty WB, Gardiner NJ, Das P, Qiu J, McMahon SB, et al. (2004) Conditioning injury-induced spinal axon regeneration fails in interleukin-6 knock-out mice. *J Neurosci* 24: 4432–4443.
  52. Hall AK, Ai X, Hickman GE, MacPhedran SE, Nduaguba CO, et al. (1997) The generation of neuronal heterogeneity in rat sensory ganglion. *J Neurosci* 17: 2775–2784.
